# Supplementary material for: 2018 Korean Liver Cancer Association–National Cancer Center Korea Practice Guidelines for the Management of Hepatocellular Carcinoma
Source: PubMed Central journal article supplement — Korean J Radiol. 2019 Jun 25;20(7):1042–113. doi: 10.3348/kjr.2019.0140 (PMC6609431; doi:10.3348/kjr.2019.0140), 2019-06-25
Supplement: kjr-20-1042-s001.pdf [file kjr-20-1042-s001.pdf]

**Supplementary Table 1. Disclosure of Conflict of Interest in Past 2 Years**

|                    |                                                                                                                                                                                                                                                                                                                                                                                                                                                                                                                                                                                                                                                                                                                                                                                                                                                                                                                                                                                       |
|--------------------|---------------------------------------------------------------------------------------------------------------------------------------------------------------------------------------------------------------------------------------------------------------------------------------------------------------------------------------------------------------------------------------------------------------------------------------------------------------------------------------------------------------------------------------------------------------------------------------------------------------------------------------------------------------------------------------------------------------------------------------------------------------------------------------------------------------------------------------------------------------------------------------------------------------------------------------------------------------------------------------|
| Chairman           | Joong-Won Park reports sponsored lectures for Bayer, Eisai, Ono-BMS; consultant/advisory roles for Ono-BMS, Eisai, Midatech, Roche, Bayer; participation in clinical trials from Bayer, Ono-BMS, Eisai, Roche, Exelixis, Kowa, AstraZeneca, Blueprint.                                                                                                                                                                                                                                                                                                                                                                                                                                                                                                                                                                                                                                                                                                                                |
| Internal Medicine  | <p>Ji Hoon Kim reports sponsored lectures for Gilead, BMS, MSD, Abbvie, Chong Kun Dang, Yuhan, Dong-A, Daewoong, Teva-Handok; consultant/advisory roles for Gilead, Abbvie, Chong Kun Dang, Dong-A; participation in clinical trials from Gilead, BMS, MSD, Abbvie, Chong Kun Dang, Yuhan, Dong-A, Daewoong, Kowa.</p> <p>Young-Suk Lim reports participation in clinical trials from Bayer, BMS, Gilead.</p> <p>Dae Won Jeon reports sponsored lectures for Gilead, Yuhan, BMS, Celltrion, Dong-A; participation in clinical trials from BMS, Yuhan, Dong-A, Daewoong, BrainOn, Roche, Biototech.</p> <p>June Sung Lee, Do Young Kim, Hyeong Jun Kim, Hwi Young Kim, Soo Young Park, Joo Hyeon Shim, Jeong Hoon Lee, Ho Yeong Lim, and Jeong Won Jang report none.</p>                                                                                                                                                                                                               |
| Surgery            | <p>Kyung Sik Kim reports sponsored lecture for Fresenius Kabi Korea; consultant/advisory roles for Fresenius Kabi Korea, Samyang Biopharm.</p> <p>Dong-Sik Kim reports participation in clinical trials from Astellas Korea, Pharmbio, Hanmi, SK Chemical, Dong-A. Kyung-Suk Suh, Yang Seok Ko, Seong Hoon Kim, Seong Hoon Kim 2, Jong Man Kim, Yeong Cheol Yun, Dong Hwan Jeong, and Jai Young Cho report none.</p>                                                                                                                                                                                                                                                                                                                                                                                                                                                                                                                                                                  |
| Radiology          | <p>Jin Wook Chung reports sponsored lecture for Guerbet; participation in clinical/pre-clinical trials from BTG, Guerbet.</p> <p>So Yeon Kim reports sponsored lectures for Bayer, Samsung Medicine; consultant/advisory roles for Bayer, Samsung Medicine; participation in clinical trials from Samsung Medicine.</p> <p>Jeong Min Lee reports sponsored lectures for Bayer, Guerbet, Philips, Samsung Medicine; participation in trials from Acuzen, Starmed, Cannon Medical, RF Medical, GE Healthcare. Hyeon Cheol Lim reports sponsored lecture for STARmed; participation in clinical trial from NeuWave.</p> <p>Ho Jong Cheon reports sponsored lecture for Engain, BTG; participation in clinical trials from Engain, Jeil Pharm, BTG, Sirtex.</p> <p>Jun Il Choi reports sponsored lecture for Bayer; participation in clinical trials from Guerbet, Samsung Medicine.</p> <p>Young Hwan Koh, Kyeong Min Kim, Young Hwan Kim, In Joon Lee, and Sung Ki Cho report none.</p> |
| Radiation Oncology | Jinsil Seong, Chul Seung Kay, Mi-Sook Kim, Tae Hyun Kim, Hee Chul Park, Sun Hyeon Bae, Sang Min Yoon, Won Il Jang, and Won Sup Yoon report none.                                                                                                                                                                                                                                                                                                                                                                                                                                                                                                                                                                                                                                                                                                                                                                                                                                      |
