# Supplementary material for: 2018 Korean Liver Cancer Association–National Cancer Center Korea Practice Guidelines for the Management of Hepatocellular Carcinoma
Source: PubMed Central journal article supplement — Korean J Radiol. 2019 Jun 25;20(7):1042–113. doi: 10.3348/kjr.2019.0140 (PMC6609431; doi:10.3348/kjr.2019.0140), 2019-06-25
Supplement: kjr-20-1042-s002.pdf [file kjr-20-1042-s002.pdf]

**Supplementary Table 2. 2018 KLCA-NCC Korea Practice Guideline Revision Committee**

|                    |                              |                                           |                             |
|--------------------|------------------------------|-------------------------------------------|-----------------------------|
| Chairman           | Joong-Won Park               | Hepatology, National Cancer Center, Korea |                             |
| Head of Department | June Sung Lee                | Hepatology, Inje University               |                             |
|                    | Kyung-Suk Suh                | Surgery, Seoul National University        |                             |
|                    | Jin Wook Chung               | Radiology, Seoul National University      |                             |
|                    | Jinsil Seong                 | Radiation Oncology, Yonsei University     |                             |
| Internal Medicine  | Do Young Kim                 | Hepatology, Yonsei University             |                             |
|                    | Ji Hoon Kim                  | Hepatology, Korea University              |                             |
|                    | Hyeong Jun Kim               | Hepatology, Chung-Ang University          |                             |
|                    | Hwi Young Kim                | Hepatology, Ewha Womans University        |                             |
|                    | Soo Young Park               | Hepatology, Kyungpook National University |                             |
|                    | Joo Hyeon Shim               | Hepatology, Ulsan University              |                             |
|                    | Jeong Hoon Lee               | Hepatology, Seoul National University     |                             |
|                    | Young-Suk Lim                | Hepatology, Ulsan University              |                             |
|                    | Ho Yeong Lim                 | Oncology, Sungkyunkwan University         |                             |
|                    | Jeong Won Jang               | Hepatology, Catholic University of Korea  |                             |
|                    | Jae Young Jang               | Hepatology, Soonchunhyang University      |                             |
|                    | Dae Won Jeon                 | Hepatology, Hanyang University            |                             |
|                    | Surgery                      | Yang Seok Ko                              | Chonnam National University |
|                    |                              | Kyung Sik Kim                             | Yonsei University           |
| Dong-Sik Kim       |                              | Korea University                          |                             |
| Seong Hoon Kim     |                              | National Cancer Center, Korea             |                             |
| Seong Hoon Kim 2   |                              | Wonju Yonsei University                   |                             |
| Jong Man Kim       |                              | Sungkyunkwan University                   |                             |
| Yeong Cheol Yun    |                              | The Catholic University of Korea          |                             |
| Dong Hwan Jeong    |                              | Ulsan University                          |                             |
| Jai Young Cho      | Seoul National University    |                                           |                             |
| Radiology          | Young Hwan Koh               | National Cancer Center, Korea             |                             |
|                    | Gyoung Min Kim               | Yonsei University                         |                             |
|                    | So Yeon Kim                  | Ulsan University                          |                             |
|                    | Young Hwan Kim               | Pohang Stroke and Spine Hospital          |                             |
|                    | In Joon Lee                  | National Cancer Center, Korea             |                             |
|                    | Jeong Min Lee                | Seoul National University                 |                             |
|                    | Hyeon Cheol Lim              | Sungkyunkwan University                   |                             |
|                    | Sung Ki Cho                  | Sungkyunkwan University                   |                             |
|                    | Ho Jong Chun                 | The Catholic University of Korea          |                             |
|                    | Joon-Il Choi                 | The Catholic University of Korea          |                             |
| Radiation Oncology | Chul Seung Kay               | The Catholic University of Korea          |                             |
|                    | Mi-Sook Kim                  | Korea Cancer Center Hospital              |                             |
|                    | Tae Hyun Kim                 | National Cancer Center, Korea             |                             |
|                    | Hee Chul Park                | Sungkyunkwan University                   |                             |
|                    | Sun Hyeon Bae                | Soonchunhyang University                  |                             |
|                    | Sang Min Yoon                | Ulsan University                          |                             |
| Won Sup Yoon       | Korea University             |                                           |                             |
| Won Il Jang        | Korea Cancer Center Hospital |                                           |                             |

KLCA = Korean Liver Cancer Association, NCC = National Cancer Center
