# Supplementary material for: 2018 Korean Liver Cancer Association–National Cancer Center Korea Practice Guidelines for the Management of Hepatocellular Carcinoma
Source: PubMed Central journal article supplement — Korean J Radiol. 2019 Jun 25;20(7):1042–113. doi: 10.3348/kjr.2019.0140 (PMC6609431; doi:10.3348/kjr.2019.0140), 2019-06-25
Supplement: kjr-20-1042-s003.pdf [file kjr-20-1042-s003.pdf]

### Supplementary Table 3. List of Clinical Questions

---

#### Internal Medicine

1. Could incidence of HCC be reduced by primary, secondary, or tertiary prevention?
    - P: General public subject to preventive measures (primary prevention), group with risk of HCC (secondary prevention), and group with risk of HCC recurrence (tertiary prevention)
    - I: Group that underwent preventive measures
    - C: Group that did not undergo preventive measures
    - O: HCC incidence rate (primary and secondary prevention), recurrence rate (tertiary prevention), survival rate
  - 1-1. Does DAA reduce HCC incidence in chronic hepatitis C?
    - P: Group of patients with chronic hepatitis C
    - I: DAA treatment group
    - C: Non-DAA treatment group
    - O: HCC incidence rate
  2. Can HCC surveillance test reduce mortality in high-risk group?
    - P: Group with high risk of liver cancer
    - I: Group that underwent liver cancer surveillance test
    - C: Group that did not undergo liver cancer surveillance test
    - O: Mortality related to HCC
  3. What should be done for indeterminate nodule not definitively diagnosed by imaging?
    - P: Patients with indeterminate nodules that cannot be diagnosed definitively as HCC
    - I: Pathologic diagnosis through biopsy
    - C: Repeated imaging and follow-up of tumor markers
    - O: Accuracy of diagnosis
  4. What tests should be performed to investigate extrahepatic spread after HCC diagnosis?
    - P: Patients diagnosed with HCC
    - I: Additional imaging performed
    - C: Additional imaging not performed
    - O: Evaluation of extrahepatic spread and accurate staging
  5. What HCC staging system is suitable for Korea?
    - P: HCC staging system
    - I: mUICC staging
    - C: Non-mUICC staging
    - O: Accuracy in prediction of prognosis and treatment plan
  6. What criteria can we use to assess response to HCC treatment?
    - P: HCC patients
    - I: Assessment of tumor response (WHO criteria, RECIST, mRECIST, RECIST 1.1, iRECIST, Choi criteria)
    - C: Survival rate
    - O: Correlation
  7. At what intervals and how should we follow up recurrence after radical treatment, such as locoregional therapies, hepatic resection, liver transplantation, etc.?
    - P: HCC patients with radical treatment
    - I: Dynamic contrast-enhanced imaging
    - C: Alternate interval (3 months/6 months/9 months/12 months) test
    - O: HCC incidence rate, survival rate
  8. Is additional anticancer adjuvant therapy or immunotherapy necessary after radical hepatic resection or locoregional therapy?
    - P: Patients who underwent radical hepatic resection or locoregional therapy
    - I: Additional adjuvant therapy, such as anticancer treatment or immunotherapy
    - C: Monitoring without additional adjuvant therapy
    - O: Decrease in recurrence rate, increase in survival rate
-

### Supplementary Table 3. List of Clinical Questions (Continued)

---

9. After full recovery of HCC, does DAA increase recurrence of HCC?  
P: Group showing full recovery after HCC treatment  
I: DAA treatment group  
C: Non-DAA treatment group  
O: HCC recurrence rate
10. What is suitable secondary treatment for HCC that has recurred after radical treatment, such as locoregional therapies, hepatic resection, liver transplantation, etc.?  
P: HCC relapsed after radical treatment  
I: Surgical (hepatic resection, liver transplantation) treatment group  
C: Non-surgical (RFA, TACE, sorafenib) treatment group  
O: Survival rate
11. What is definition of TACE refractoriness and secondary treatment for these patients?  
P: Patients who received TACE for HCC where hepatic resection/transplantation is impossible  
I: Sorafenib, HAIC, TACE + sorafenib  
C: Continue TACE or best supportive care  
O: Survival rate
12. What are molecular targeted agents and immunotherapy agents that can be primarily used on progressive HCC patients aside from sorafenib, and what are effects?  
P: Progressive HCC patients  
I: Molecular targeted agents and immunotherapy agents  
C: Placebo or standard treatment (sorafenib)  
O: Total survival period
13. What is effective secondary targeted agent for patients who failed treatment with sorafenib?  
P: Patients who received sorafenib treatment for HCC but failed treatment  
I: Regorafenib, nivolumab, cabozantinib  
C: Conservative treatment  
O: Survival rate
14. What are effects and safety of combined treatment of sorafenib and locoregional therapy for progressive HCC?  
P: Progressive HCC patients  
I: Combined treatment of sorafenib and locoregional therapy  
C: Sorafenib alone  
O: Survival rate and safety

#### Surgery

1. In what case is hepatic resection suitable for primary treatment of HCC?  
P: HCC patients  
I: Liver resection  
C: Other treatment modalities  
O: OS
  2. Is hepatic resection suitable for HCC accompanied by portal hypertension or hyperbilirubinemia?  
P: HCC patients with portal hypertension or hyperbilirubinemia  
I: Liver resection  
C: Other treatment modalities  
O: OS, quality of life
  3. Is hepatic resection useful for progressed HCC patients?  
P: Advanced stage HCC patients  
I: Liver resection  
C: TACE, RT, sorafenib  
O: DFS, OS
-

### Supplementary Table 3. List of Clinical Questions (Continued)

---

4. In what case can laparoscopic hepatic resection be performed?  
P: HCC patients  
I: Laparoscopic liver resection  
C: Conventional open liver resection  
O: DFS, OS, complications, quality of life
5. In what case is liver transplantation suitable for primary treatment of HCC?  
P: HCC patients  
I: Liver transplantation  
C: TACE, RT, sorafenib  
O: OS
6. When is right time to perform bridging therapy for HCC prior to liver transplantation?  
P: HCC patients within Milan criteria  
I: Local ablation treatment or TACE  
C: Conservative treatment  
O: DFS, OS
7. Is liver transplantation useful after downstaging for progressive HCC patients?  
P: Advanced stage HCC patients  
I: Liver transplantation after downstaging  
C: TACE, RT, sorafenib  
O: DFS, OS
8. Is liver transplantation useful for HCC patients beyond Milan criteria without vascular invasion or extra-hepatic metastasis?  
P: HCC patients above Milan criteria without vascular invasion or extra-hepatic metastasis  
I: Liver transplantation  
C: TACE, RT, Sorafenib  
O: DFS, OS
9. Is salvage liver transplantation useful for HCC patients whose disease recurred after hepatic resection?  
P: Recurred HCC patients after liver resection  
I: Salvage liver transplantation  
C: Liver resection, ablation therapy, TACE  
O: DFS, OS

#### Radiology

1. What is suitable diagnostic test for patients suspected of having HCC?  
P: Patients suspected of having HCC  
I: Dynamic contrast-enhanced CT  
C: Dynamic contrast-enhanced MRI, hepatocyte-specific contrast-enhanced MRI, contrast-enhanced sonography  
O: Sensitivity, singularity
  2. What is standard method of imaging diagnosis for patients suspected of having HCC?  
P: Patients suspected of having HCC  
I: Opinions about washout in arterial phase contrast enhancement/portal phase or delayed phase  
C: Auxiliary image opinions  
O: Sensitivity, singularity
  3. Can HCC be diagnosed for nodules smaller than 1 cm on patients suspected of having HCC?  
P: Patients suspected of having HCC  
I: HCC smaller than 1 cm  
C: HCC that is 1 cm or bigger  
O: Sensitivity, singularity
  4. Is standard method of imaging diagnosis same in initial diagnosis as in already diagnosed HCC patients?  
P: HCC patients already diagnosed  
I: Application of the same image diagnosis standard as initial diagnosis  
C: Application of image diagnosis standard different from initial diagnosis  
O: Accuracy of diagnosis
-

### Supplementary Table 3. List of Clinical Questions (Continued)

---

5. Should radiation dose be considered when performing CT for HCC patients?
    - P: HCC patients
    - I: CT performed
    - C: CT not performed
    - O: Risk-benefit analysis
  6. Are similar results expected from RFA as for surgical resection for HCC in terms of survival rate?
    - P: HCC patients
    - I: RFA
    - C: Hepatic resection
    - O: OS, PFS, TTP, complications
  7. Is RFA superior to ethanol injection?
    - P: HCC patients
    - I: RFA
    - C: Ethanol
    - O: OS, PFS, TTP, complications
  8. Is combined treatment of RFA and TACE superior to RFA alone for HCC?
    - P: HCC patients
    - I: RFA + TACE
    - C: RFA alone
    - O: OS, PFS, TTP, complications
  9. Is cryoablation, microwave ablation useful locoregional therapy for HCC compared with RFA?
    - P: HCC patients
    - I: Cryoablation, microwave ablation
    - C: RFA, ethanol ablation
    - O: OS, PFS, TTP, complications
  10. In what case is TACE suitable for adjuvant treatment of HCC?
    - P: HCC patients
    - I: TACE
    - C: Other treatment modalities
    - O: OS
  11. Is performing TACE in advanced stage appropriate?
    - P: Advanced stage HCC patients
    - I: TACE
    - C: Conservative treatment, systemic chemotherapy
    - O: OS, quality of life
  12. Is superselective TACE useful in TACE for HCC?
    - P: HCC patients
    - I: Selective TACE
    - C: Nonselective TACE
    - O: Tumor response, OS
  13. In what case is DEB-TACE adaptable? What benefits does it have compared with conventional TACE, and can it be recommended as standard therapy?
    - P: HCC patients
    - I: DEB-TACE
    - C: Conventional TACE
    - O: OS, PFS, TTP, complications, cost
  14. Can TARE be considered as a standard therapy (that replaces TACE)?
    - P: HCC patients
    - I: TARE
    - C: TACE
    - O: OS, PFS, TTP, complications, cost
-

### Supplementary Table 3. List of Clinical Questions (Continued)

---

15. Is TACE useful for treatment of HCC that has relapsed after hepatic resection?

P: Recurred HCC following hepatectomy

I: TACE

C: RFA, surgery

O: OS, PFS, TTP, complications

#### Radiation Oncology

1. Can EBRT (radiotherapy including hypofractionated radiotherapy, stereotactic body radiotherapy, and particle radiotherapy) be performed for HCC in which hepatic resection or locoregional therapy is impossible?

P: HCC in which hepatic resection or locoregional therapy is impossible

I: EBRT including particle radiotherapy, hypofractionated radiotherapy, or stereotactic body radiotherapy)

C: TACE

O: Treatment result (OS, local control, progression free survival, toxicity)

2. In what case can EBRT be performed safely? What are indications?

P: HCC patients

I: EBRT

C: Dose-volumetric parameters

O: Radiation induced liver toxicity

3. Is combined treatment with EBRT effective for HCC in which TACE is expected to show inadequate effect?

P: Locally advanced HCC patients

I: Combined treatment with TACE and EBRT

C: TACE alone

O: OS

4. Can EBRT be performed for HCC with macrovascular invasion?

P: HCC patients with macrovascular invasion

I: EBRT

C: Targeted agent (sorafenib)

O: OS

5. Can EBRT be performed to alleviate pain caused by distant metastases of HCC or symptoms of metastatic cancer?

P: Patients with symptomatic HCC or metastatic disease

I: EBRT

C: Supportive care or systemic treatment

O: Symptom palliation/local control

6. Can EBRT perform role of down staging for surgical treatment in progressive HCC?

P: Locally advanced HCC patients

I: EBRT

C: Targeted agent (sorafenib)

O: Safety survival/OS

7. Can EBRT be performed for HCC that has relapsed (refractory) after hepatic resection, RFA, ethanol injection, or TACE?

P: Recurrent or refractory HCC after locoregional treatment

I: EBRT

C: Repeated resection, RFA, ethanol injection, or TACE

O: Treatment result (OS, local control, progression free survival, toxicity)

---

CT = computed tomography, DAA = direct-acting antiviral, DEB = drug-eluting bead, DFS = disease-free survival, EBRT = external-beam radiation therapy, HAIC = hepatic arterial infusion chemotherapy, HCC = hepatocellular carcinoma, iRECIST = immunotherapy RECIST, mRECIST = modified RECIST, MRI = magnetic resonance imaging, mUICC, modified Union for International Cancer Control, OS = overall survival, PFS = progression-free survival, RECIST = Response Evaluation Criteria in Solid Tumors, RFA = radiofrequency ablation, TACE = transarterial chemoembolization, TARE = transarterial embolization, TTP = time-to-progression, WHO = World Health Organization
