# Supplementary material for: 2018 Korean Liver Cancer Association–National Cancer Center Korea Practice Guidelines for the Management of Hepatocellular Carcinoma
Source: PubMed Central journal article supplement — Korean J Radiol. 2019 Jun 25;20(7):1042–113. doi: 10.3348/kjr.2019.0140 (PMC6609431; doi:10.3348/kjr.2019.0140), 2019-06-25
Supplement: kjr-20-1042-s004.pdf [file kjr-20-1042-s004.pdf]

#### Supplementary Table 4. Process of Revision of 2018 KLCA-NCC Korea Practice Guidelines for Management of Hepatocellular Carcinoma

---

July 5, 2003: Established 2003 KLCSG-NCC Korea practice guidelines for management of HCC

June 27, 2009: Revised 2009 KLCSG-NCC Korea practice guidelines for management of HCC

June 14, 2014: Revised 2014 KLCSG-NCC Korea practice guidelines for management of HCC

May 2015: Published English version of 2014 guidelines in *Gut and Liver* and *Korean Journal of Radiology*

June 2017: Prepared NCC research fund (Principal Investigator Joong-Won Park, Project No. 1731510-1) after obtaining consent of NCC regarding proposal of revision of guidelines by KLCA (Chairman Joong-Won Park) and formed KPGRC (Supplementary Table 2)

June 26, 2017: Initial meeting of 2018 KPGRC (Seoul National University Hospital Cancer Research Institute 1F auditorium)

July to October 2017: Established first draft after several meetings in each department

October 28, 2017: First general meeting of KPGRC (Seoul National University Hospital Cancer Research Institute 1F auditorium)

November 2017: Each department held meetings about contents discussed at 1st general meeting and made revisions

November 25, 2017: Second general meeting of KPGRC (Seoul National University Hospital Cancer Research Institute 1F auditorium)

December 2017 to January 2018: Each department held meetings about contents discussed at 2nd general meeting and made revisions

January 27, 2018: Third general meeting of KPGRC (Seoul National University Hospital Cancer Research Institute 1F auditorium)

February to March 2018: Each department held meetings about contents discussed at 3rd general meeting, forwarded revised draft online, and updated revision

March 22, 2018: First department head meeting (Gwanghwamun Dalgaebi)

April 26, 2018: Second department head meeting (Gwanghwamun Dalgaebi)

May 2018: Advisory board review

Advisory board: Byeong In Choi (Chung-Ang University Radiology), Byeong Cheol Yoo (Konkuk University Internal Medicine), Gwang Hyeop Han (Yonsei University Internal Medicine), Seung Woon Baek (Sungkyunkwan University Internal Medicine), Gwan Soo Byeon (Korea University Internal Medicine), Won Jae Lee (Sungkyunkwan University Radiology), Tae Yoo Kim (Seoul National University Internal Medicine), Young Nyeon Park (Yonsei University Pathology), Shin Hwang (University of Ulsan College of Medicine Surgery)

May 31, 2018: Public meeting (Seoul National University Hospital Life Research Institute B1 auditorium)

June 2018: Third department head meeting online

June 2018: Final draft approved by board of directors of KLCA and NCC

June 15, 2018: Presented Korean version of 2018 KLCA-NCC Practice Guidelines for Management of HCC (Liver Week, Grand Hyatt Incheon)

---

KLCSG = Korean Liver Cancer Study Group, KPGRC = Korea Practice Guideline Revision Committee
